# Supplementary material for: Selective conversion of CO2 and H2 into aromatics
Source: PubMed Central journal article supplement (PMC6110867; doi:10.1038/s41467-018-05880-4), 2018-08-27
Supplement: 41467_2018_5880_MOESM1_ESM.pdf [file 41467_2018_5880_MOESM1_ESM.pdf]

# **Selective conversion of CO<sub>2</sub> and H<sub>2</sub> into aromatics**

**Ni et al.**

## Supporting information

### Supplementary Methods

Catalysts characterization.

The XRD results were recorded on a PANalytical X'Pert PRO X-ray diffractometer with Cu K $\alpha$  radiation. The chemical composition was determined on a Philips Magix-601 X-ray fluorescence (XRF) spectrometer. SEM measurements were carried out on an SU8020 scanning electron microscopy. TEM images and element mappings were obtained on a JEM-2100 microscope at 200 kV. The BET surface areas were detected by N<sub>2</sub> adsorption at 77 K on a Micromeritics ASAP 2020 system and calculated by the standard multi-point method. H<sub>2</sub>-TPR profiles were tested by a Micromeritics AutoChem II 2920 equipped with a TCD detector in a 30 ml min<sup>-1</sup> H<sub>2</sub>/Ar (H<sub>2</sub>/Ar=10/90) mixture with a ramping rate of 10 K min<sup>-1</sup>. NH<sub>3</sub>-TPD results were also tested by a Micromeritics AutoChem II 2920 equipped with a TCD detector. The adsorption of NH<sub>3</sub> was performed at 373 K in a 30 ml min<sup>-1</sup> NH<sub>3</sub>/He (NH<sub>3</sub>/He=5/95) mixture for 1 h, and desorption was performed in He flow by raising the temperature to 873 K at a rate of 10 K min<sup>-1</sup>. *Operando* DRIFTS were detected on a Bruker Tensor 27 instrument with a MCT detector. The catalyst powder was pressed into a diffuse reflectance infrared cell with ZnSe window. First, the catalyst was treated by 30 ml min<sup>-1</sup> H<sub>2</sub>/Ar (H<sub>2</sub>/Ar=3/7) mixture at 593 K and 0.1 MPa for 30 min and the background spectrum was collected under the same conditions. Subsequently, 30 ml min<sup>-1</sup> mixed gas (H<sub>2</sub>/CO<sub>2</sub>/Ar= 3/1/0.2 or H<sub>2</sub>/ CO/ Ar = 3/1/0.2) was introduced at 593 K and 0.1 MPa and the *operando* DRIFT spectra obtained by collecting 32 scans at 4 cm<sup>-1</sup> resolution were recorded. FTIR spectra after 2, 6-di-tert-butyl-pyridine (DTBPy) adsorption were obtained on a Bruker Tensor 27 instrument with a resolution of 4 cm<sup>-1</sup>. Before each measurement, samples were pressed into a self-supporting wafer and evacuated in an IR cell at 673 K for 1 h, then cooled to 423 K and the background spectra were collected. Adsorption of DTBPy was conducted at 423 K for 15 min to ensure saturated loading and then evacuation was sufficiently carried out before each measurement.

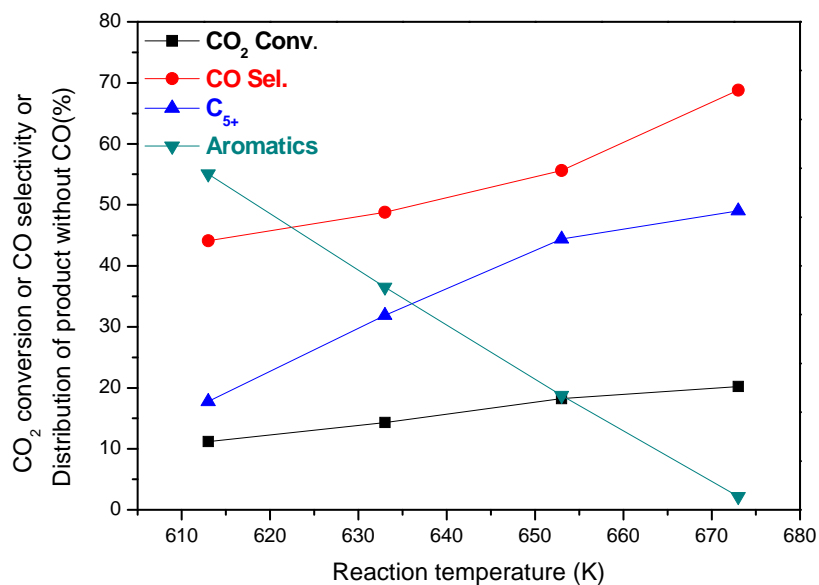

**Supplementary Figure 1 | Influence of reaction temperature on the CO<sub>2</sub> hydrogenation over ZnAlO<sub>x</sub>&H-ZSM-5.** Reaction conditions: Space velocity = 6000 ml g<sup>-1</sup> h<sup>-1</sup>, 3.0 MPa, H<sub>2</sub>/CO<sub>2</sub>/Ar= 3/1/0.2. Note that the C<sub>5+</sub> excludes aromatics.

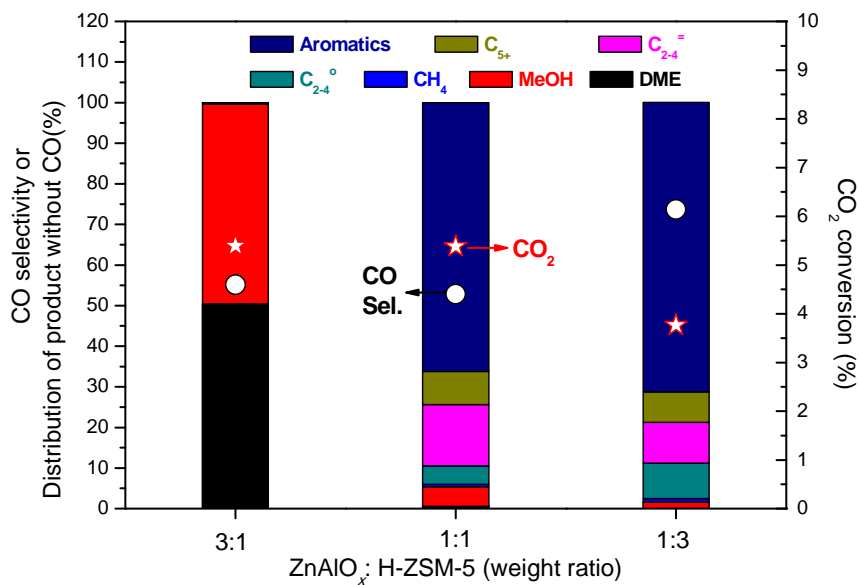

**Supplementary Figure 2 | The effect of the weight ratio of Oxides/Zeolites on the CO<sub>2</sub> hydrogenation over ZnAlO<sub>x</sub>&H-ZSM-5.** Reaction conditions: Space velocity = 6000 ml g<sup>-1</sup> h<sup>-1</sup>, 3.0 MPa, 593 K, H<sub>2</sub>/CO<sub>2</sub>/Ar= 3/1/0.2. Note that the C<sub>5+</sub> excludes aromatics. C<sub>2-4</sub><sup>=</sup> and C<sub>2-4</sub><sup>°</sup> refer to C<sub>2</sub>-C<sub>4</sub> olefins and paraffins, respectively.

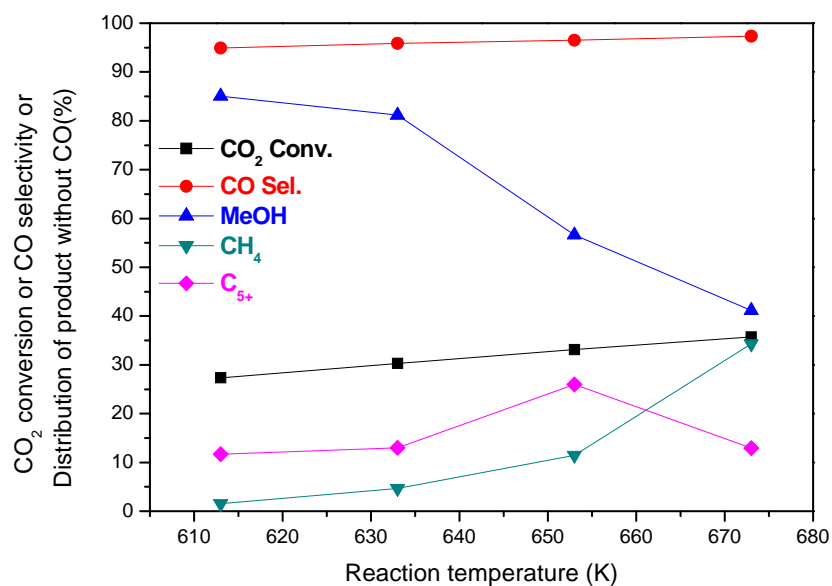

**Supplementary Figure 3 | Influence of reaction temperature on the CO<sub>2</sub> conversion over CuZnAlO<sub>x</sub>&H-ZSM-5.** Reaction conditions: Space velocity = 5000 ml g<sup>-1</sup> h<sup>-1</sup>, 3.0 MPa, H<sub>2</sub>/CO<sub>2</sub>/Ar= 3/1/0.2, CuZnAlO<sub>x</sub>:H-ZSM-5 (weight ratio) = 1:1. Note that the C<sub>5+</sub> excludes aromatics.

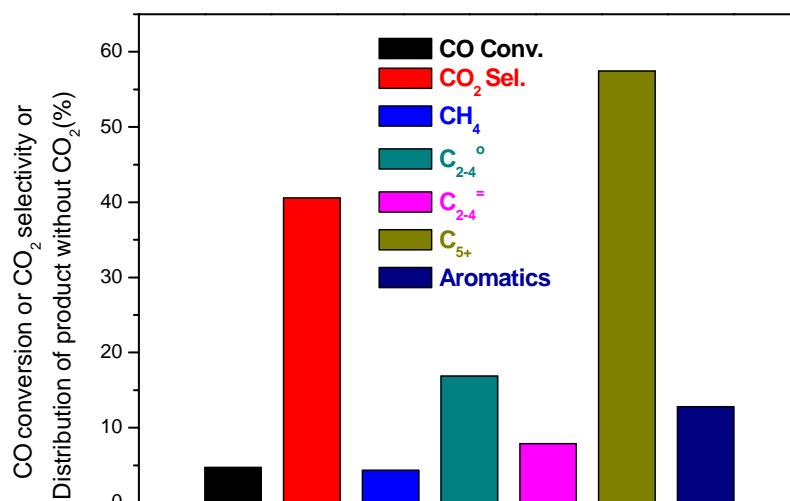

**Supplementary Figure 4 | Results of the CO hydrogenation over ZnAlO<sub>x</sub>&H-ZSM-5.** Reaction conditions: Space velocity = 6000 ml g<sup>-1</sup> h<sup>-1</sup>, 3.0 MPa, 593 K, H<sub>2</sub>/CO/Ar= 3/1/0.2. Note that the C<sub>5+</sub> excludes aromatics. C<sub>2-4</sub><sup>=</sup> and C<sub>2-4</sub><sup>o</sup> refer to C<sub>2</sub>-C<sub>4</sub> olefins and paraffins, respectively.

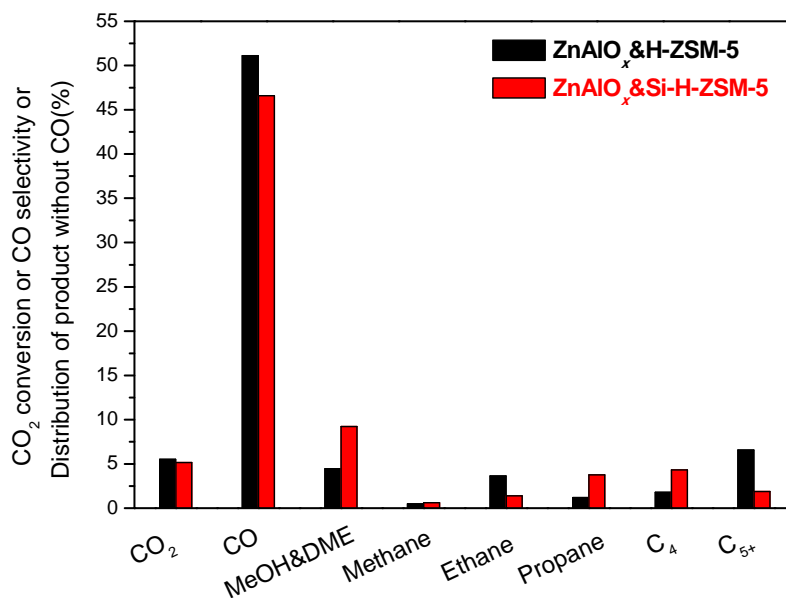

**Supplementary Figure 5 | Comparisons of catalytic behaviors over ZnAlO<sub>x</sub>&H-ZSM-5 and ZnAlO<sub>x</sub>&Si-H-ZSM-5.** Reaction conditions: Space velocity = 6000 ml g<sup>-1</sup> h<sup>-1</sup>, 3.0 MPa, 593 K, H<sub>2</sub>/CO<sub>2</sub>/Ar= 3/1/0.2. Note that the C<sub>5+</sub> excludes aromatics.<sup>1</sup>

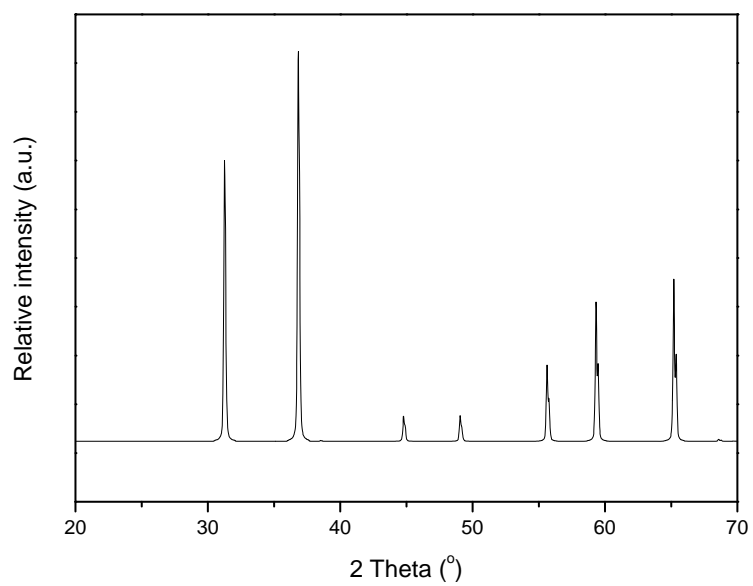

**Supplementary Figure 6 | XRD patterns of cubic  $\text{ZnAl}_2\text{O}_4$  gahnite.**  
(JCPDS 05-0669).



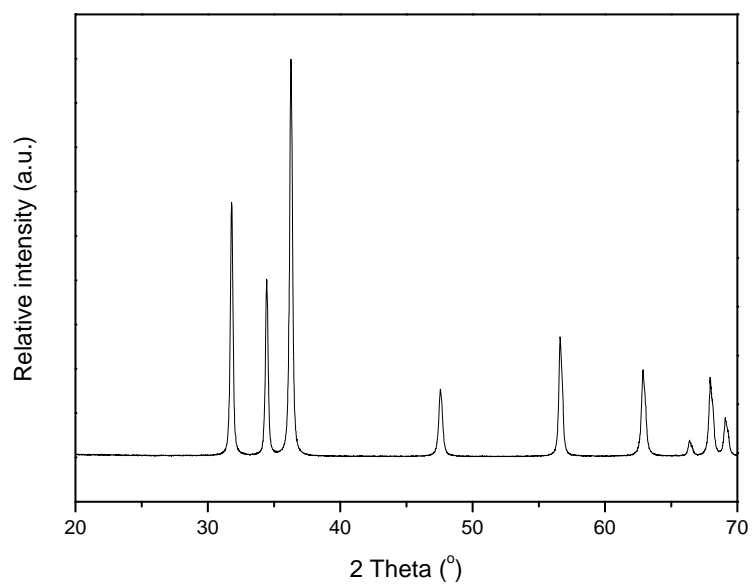

**Supplementary Figure 7 | XRD patterns of ZnO.**

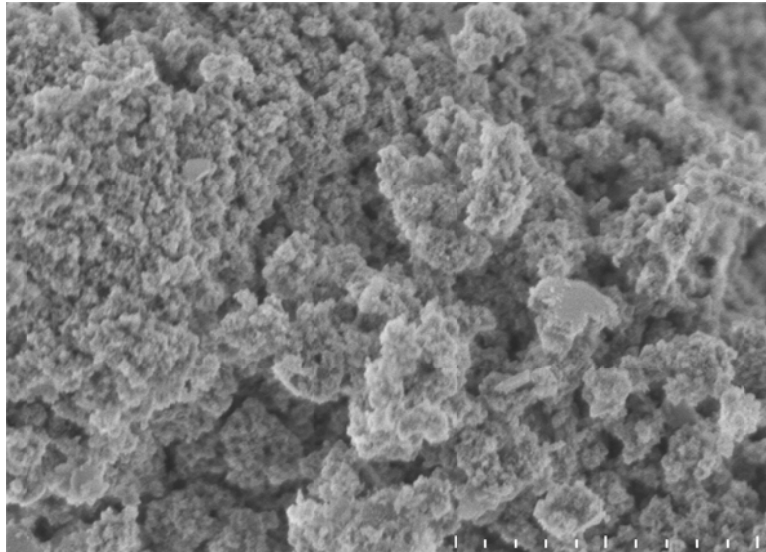

**Supplementary Figure 8 | SEM image of ZnAlO<sub>x</sub>. Scale bar: 1.0 μm.**

**Supplementary Table 1 | The elemental content and BET surface area for oxides**

| Oxides name        | Zn content <sup>a</sup> (%) | Al content <sup>a</sup> (%) | BET surface area <sup>b</sup> (m <sup>2</sup> g <sup>-1</sup> ) |
|--------------------|-----------------------------|-----------------------------|-----------------------------------------------------------------|
| ZnAlO <sub>x</sub> | 41.5                        | 24.5                        | 151.0                                                           |
| ZnO                | 80.3                        | 0                           | 11.9                                                            |

<sup>a</sup> by XRF.

<sup>b</sup> by N<sub>2</sub> physical adsorption-desorption.

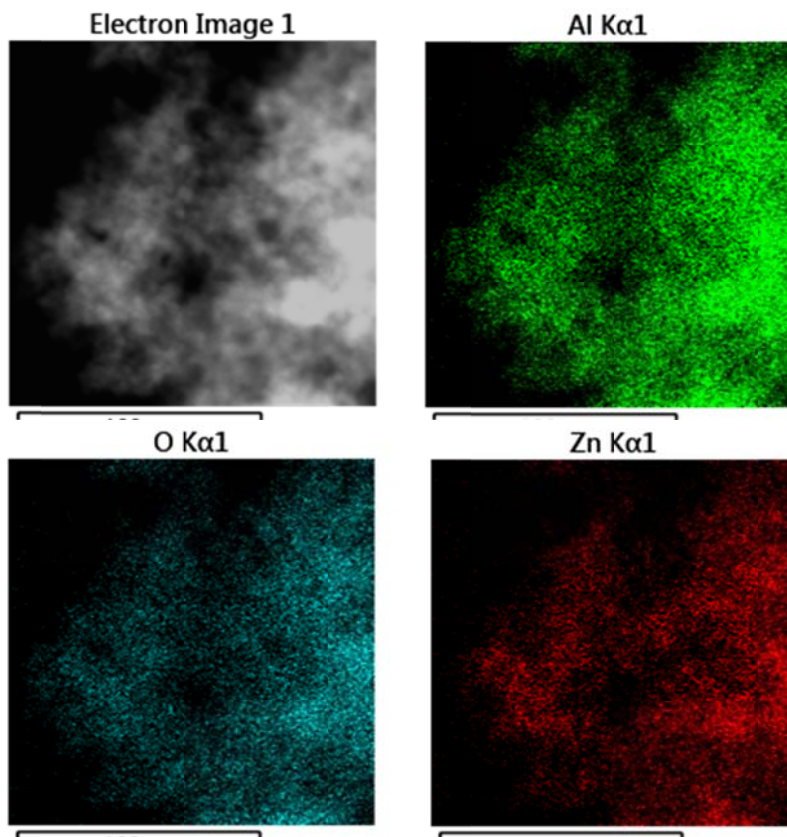

**Supplementary Figure 9 | EDS mapping of Al, O, Zn for ZnAlO<sub>x</sub>.**

Scale bar: 100 nm.

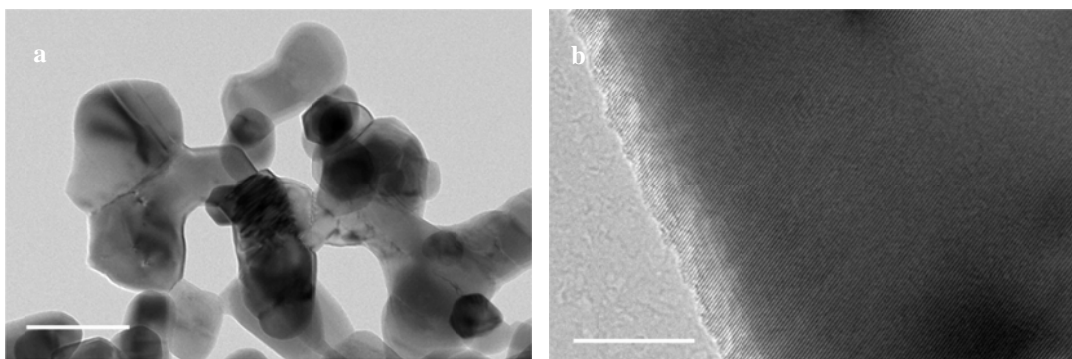

**Supplementary Figure 10 | TEM images of ZnO.**

(a) Scale bar: 100 nm. (b) Scale bar: 10 nm.

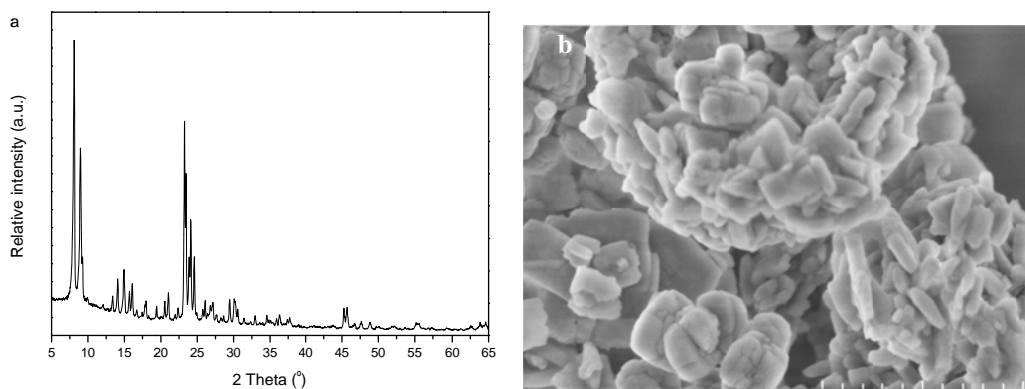

**Supplementary Figure 11 | The XRD pattern (a) and SEM image (b) of H-ZSM-5. Scale bar: 1.0 µm.**

**Supplementary Table 2 | The Si/Al ratio, acid content and BET surface area for zeolites**

| Zeolite name | Si/Al <sup>a</sup> (%) | Acid content <sup>b</sup> (mmol g <sup>-1</sup> ) | BET surface area <sup>c</sup> (m <sup>2</sup> g <sup>-1</sup> ) |
|--------------|------------------------|---------------------------------------------------|-----------------------------------------------------------------|
| H-ZSM-5      | 96.6                   | 0.109                                             | 397.0                                                           |
| Si-H-ZSM-5   | 105.8                  | 0.085                                             | 346.8                                                           |

<sup>a</sup> by XRF.

<sup>b</sup> by NH<sub>3</sub>-TPD.

<sup>c</sup> by N<sub>2</sub> physical adsorption-desorption.

**Supplementary Table 3 | The results of TPR.**

| Sample             | Weight<br>(mg) | Metal amount<br>(mmol) | Peak temperature<br>(K) | Peak<br>area | H <sub>2</sub> consumption amount<br>(mmol) |
|--------------------|----------------|------------------------|-------------------------|--------------|---------------------------------------------|
| Ag <sub>2</sub> O  | 18.2           | 0.16                   | 412.4                   | 0.47         | 0.08                                        |
| ZnO                | 201.1          | 2.48                   | 852.3                   | 0.42         | 0.07                                        |
| ZnAlO <sub>x</sub> | 200.5          | 1.28                   | 879.1                   | 0.57         | 0.10                                        |



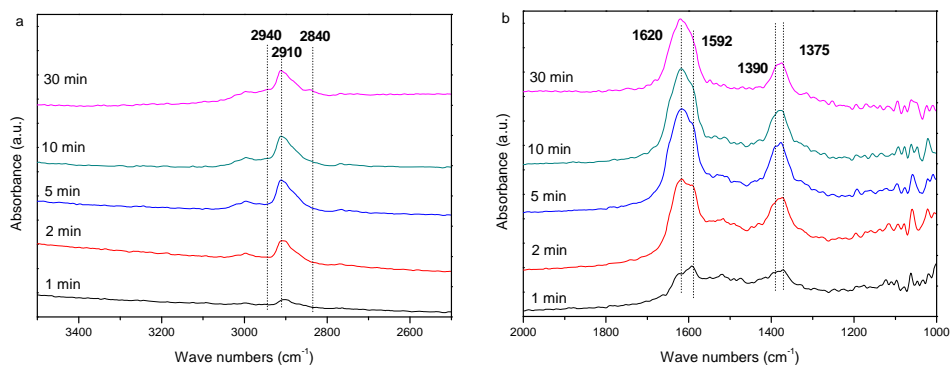

**Supplementary Figure 12 | *Operando* DRIFT spectra in CO<sub>2</sub> hydrogenation over ZnAlO<sub>x</sub>.** Conditions: 593 K, 0.1 MPa.

The bands at 1592 and 1620 cm<sup>-1</sup> are assigned to the asymmetric stretching frequency of the O-C-O bonds of surface bidentate or monodentate formate species (HCOO), respectively. The bands at 1390 and 1375 cm<sup>-1</sup> are assigned to the symmetric stretching frequency of the O-C-O bonds of surface bidentate or monodentate formate species (HCOO), respectively. The peak at 2910 cm<sup>-1</sup> is assigned to the stretching vibration  $\nu(\text{CH})$  of formate species. The bands at 2940 and 2840 cm<sup>-1</sup> are attributed to adsorbed methoxy species (CH<sub>3</sub>O)<sup>1,2</sup>.

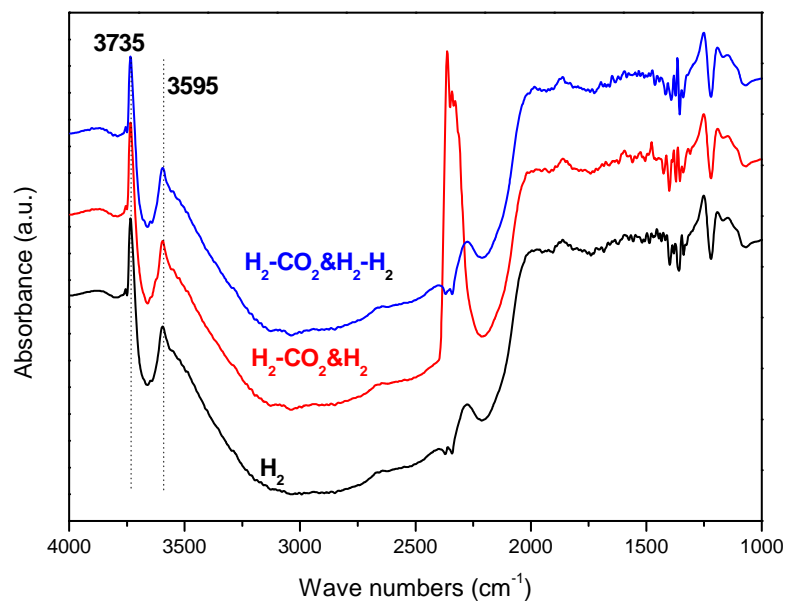

**Supplementary Figure 13 | Operando DRIFT spectra in CO<sub>2</sub> hydrogenation over H-ZSM-5.** Conditions: 593 K, 0.1 MPa. H<sub>2</sub>-CO<sub>2</sub>&H<sub>2</sub> refers to the reaction with the mixed gas of H<sub>2</sub>/CO/Ar= 3/1/0.2 after H<sub>2</sub> treatment. H<sub>2</sub>-CO<sub>2</sub>&H<sub>2</sub>-H<sub>2</sub> refers to H<sub>2</sub> sweeping after H<sub>2</sub>-CO<sub>2</sub>&H<sub>2</sub> treatment.

The bands at 3735 and 3595 cm<sup>-1</sup> are assigned to silanol and bridging hydroxyls, respectively.

## Supplementary References

1. Le Peltier, F., Chaumette, P., Saussey, J., Bettahar, M. M. & Lavalley, J. C. In situ FT-IR and kinetic study of methanol synthesis from CO<sub>2</sub>/H<sub>2</sub> over ZnAl<sub>2</sub>O<sub>4</sub> and Cu–ZnAl<sub>2</sub>O<sub>4</sub> catalysts. *J. Mol. Catal. A* **132**, 91-100 (1998).
2. Mierczynski, P. *et al.* Cu/Zn<sub>x</sub>Al<sub>y</sub>O<sub>z</sub> supported catalysts (ZnO: Al<sub>2</sub>O<sub>3</sub>=1, 2, 4) for methanol synthesis. *Catal. Today* **176**, 21-27 (2011).
